# Supplementary material for: A pure magnetite hydrogel: synthesis, properties and possible applications
Source: Royal Society of Chemistry journal article supplement (doi:10.1039/c7sm01702b), 2017-01-01
Supplement: c7sm01702b1.pdf [file c7sm01702b1.pdf]

Supplementary information for

### Pure magnetite hydrogel: synthesis, properties and possible applications

Elizaveta I. Anastasova,<sup>a</sup> Anna F. Fakhardo,<sup>a</sup> Artem I. Lepeshkin,<sup>b</sup> Vladimir Ivanovski,<sup>c</sup> Suheir Omar,<sup>d</sup> Andrey S. Drozdov\*,<sup>a</sup> and Vladimir V. Vinogradov\*<sup>a</sup>

<sup>a</sup>Laboratory of Solution Chemistry of Advanced Materials and Technologies, ITMO University, Saint-Petersburg, 197101, Russian Federation.

e-mail: vinogradov@scamt.ru

<sup>b</sup>Chair of Applied Biotechnology, ITMO University, Saint-Petersburg, 197101, Russian Federation

<sup>c</sup>Faculty of Natural Sciences and Mathematics, Institute of Chemistry, Ss. Cyril and Methodius University in Skopje, Skopje, 1000, Republic of Macedonia

<sup>d</sup>Institute of Chemistry, Casali Center for Applied Chemistry and Center for Nanoscience and Nanotechnology, The Hebrew University of Jerusalem, Jerusalem, 91904, Israel

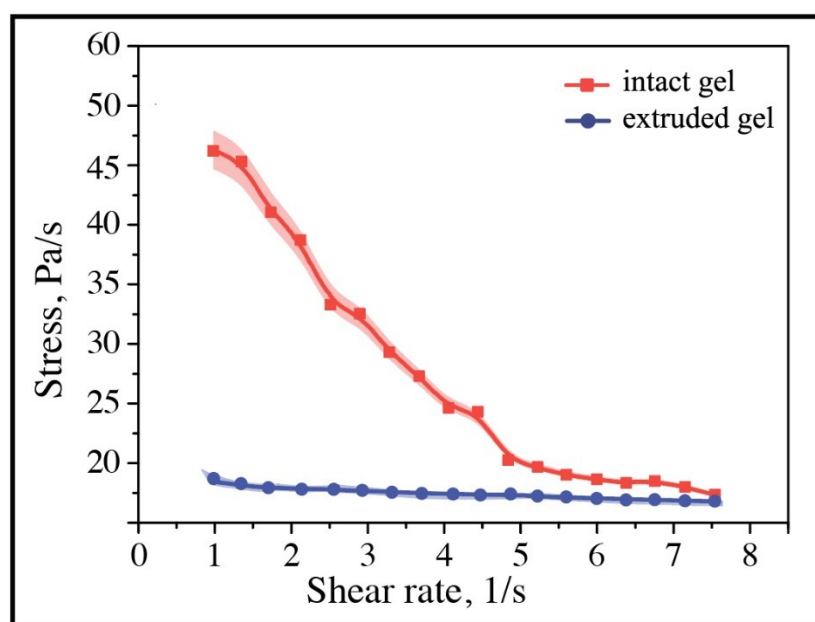

Figure 1S. Rheological parameters of intact ferria gel and ferria gel extruded with syringe

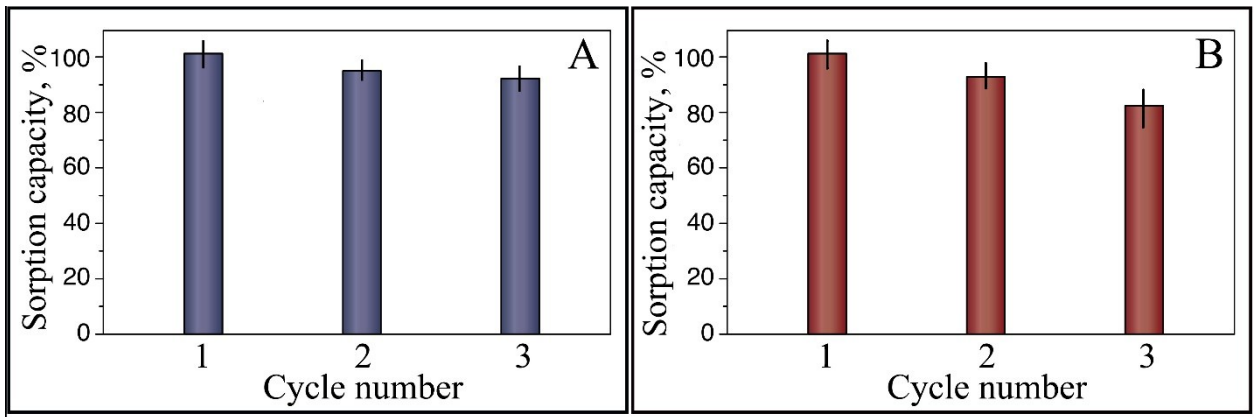

Figure 2S. Reusability of ferria gel for heavy metal ions adsorption. Adsorption of Cr<sup>6+</sup> (A) and Pb<sup>2+</sup> ions after gel regeneration
